# Supplementary material for: Policy Action Within Urban African Food Systems to Promote Healthy Food Consumption: A Realist Synthesis in Ghana and Kenya
Source: PubMed Central journal article supplement (PMC9309963; doi:10.34172/ijhpm.2020.255), 2021-02-09
Supplement: ijhpm-10-828-s001.pdf [file ijhpm-10-828-s001.pdf]

## Supplementary file 1. Search Strategy

| Topic area and search terms                               |
|-----------------------------------------------------------|
| 1. Nutrition                                              |
| Food* OR Feed* OR Diet* OR Nutrition*                     |
| 2. Geographical Location                                  |
| Ghana or Ghanaian or Kenya or Kenyan or Africa or African |
| 3. Limits                                                 |
| English only, 2000-2019; 2000-2020 (for reviews)          |
