# Supplementary material for: Policy Action Within Urban African Food Systems to Promote Healthy Food Consumption: A Realist Synthesis in Ghana and Kenya
Source: PubMed Central journal article supplement (PMC9309963; doi:10.34172/ijhpm.2020.255), 2021-02-09

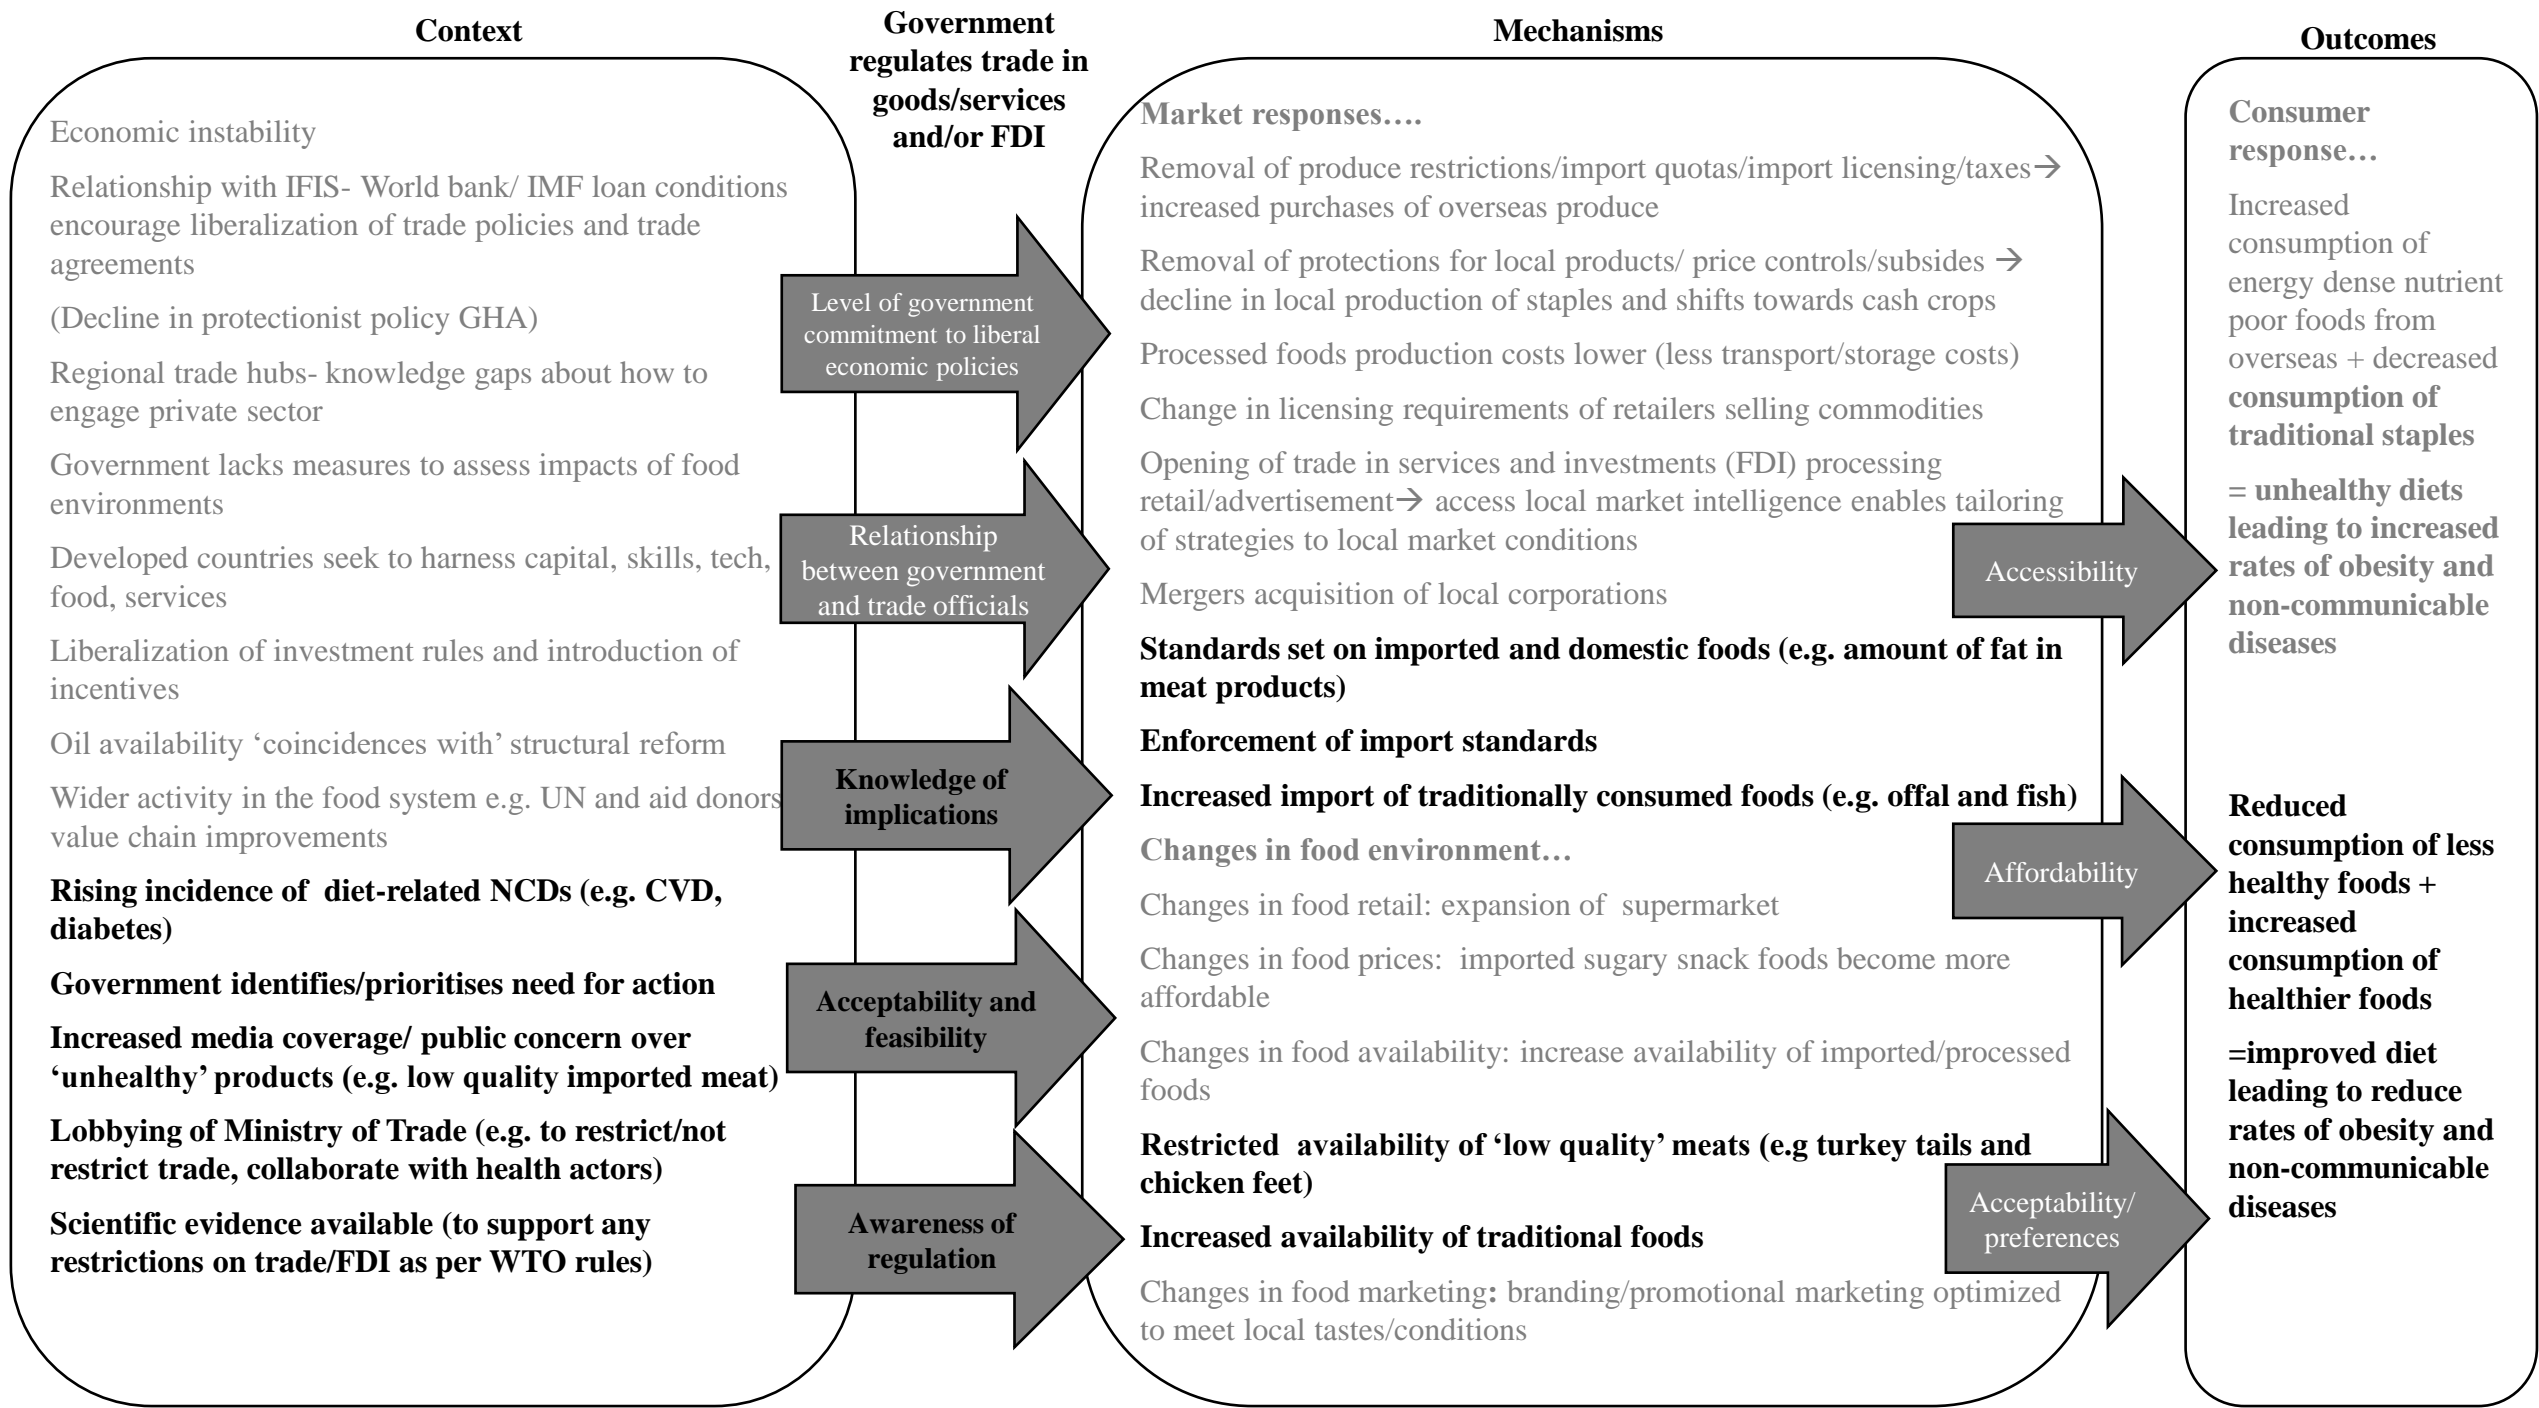

Supplement: ijhpm-10-828-s002.pdf [file ijhpm-10-828-s002.pdf]
